# Supplementary material for: A Turn-On Fluorescent Sensor for Hg2+ Based on Graphene Oxide
Source: Hindawi journal article supplement (doi:10.1155/2017/9431605), 2017-01-01
Supplement: f1 [file 9431605.f1.pdf]

## A Turn-on Fluorescent Sensor for Hg<sup>2+</sup> Based on Graphene Oxide

Yong Wu He, Yi Feng, Lian Wei Kang\*, Xiao Liang Li\*

College of Materials Science and Engineering, Hebei University of Engineering, Handan 056038, P. R.

China. E-mail address: [1263096098@qq.com](mailto:1263096098@qq.com) (L. W. Kang); [lixiaoliang@hebeu.edu.cn](mailto:lixiaoliang@hebeu.edu.cn) (X. L. Li); Tel:

+86 18630009756.

### Supporting information

As shown in figure S1, a DMF solution of BODIPY 1 is selected for the spectral investigation. The free **BODIPY 1** solution exhibits stronger fluorescence than **BGO** (excited at 480 nm) in DMF. The fluorescence enhancement effects of various metal ions on **BODIPY 1** in DMF (20μM) were investigated (excitation at 480 nm). As illustrated in Figure S1b, no significant spectral changes of **BODIPY 1** were observed in the presence of Ag<sup>+</sup>, Cd<sup>2+</sup>, Cu<sup>2+</sup>, Fe<sup>3+</sup>, Ni<sup>2+</sup>, Pb<sup>2+</sup>, and Zn<sup>2+</sup> (0.08mM), respectively. Upon addition of Hg<sup>2+</sup>, the emission band at about 510 nm was quenched about 50%.

(a)

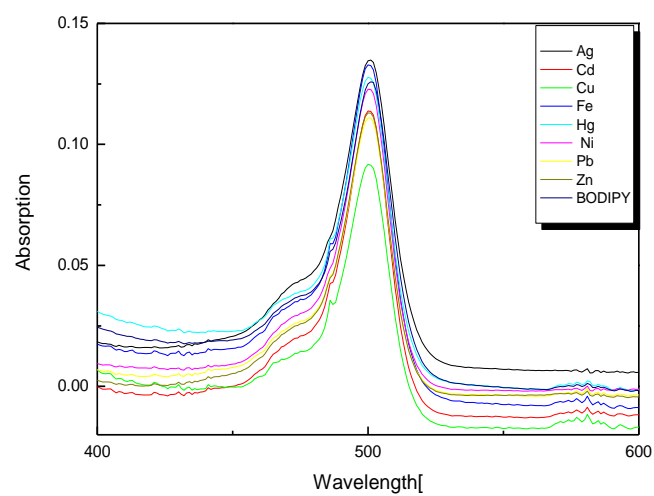

(b)

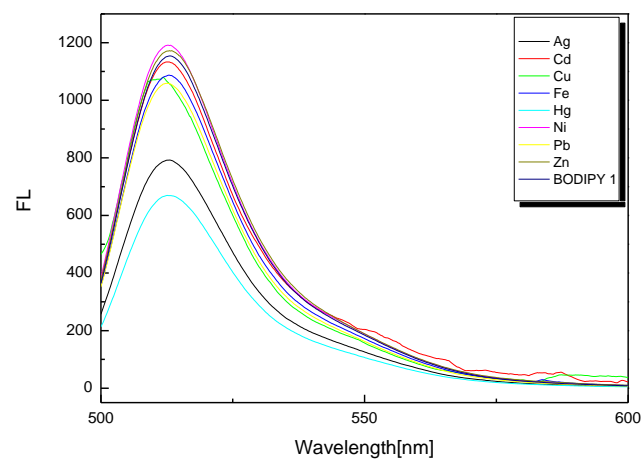

**Figure S1.** (a) UV-vis spectra and (b) fluorescent spectra (excitation was at 480 nm) for BODIPY 1 (0.5  $\mu\text{g/mL}$ ) in DMF without and with the presence of 20  $\mu\text{M}$  metal ions

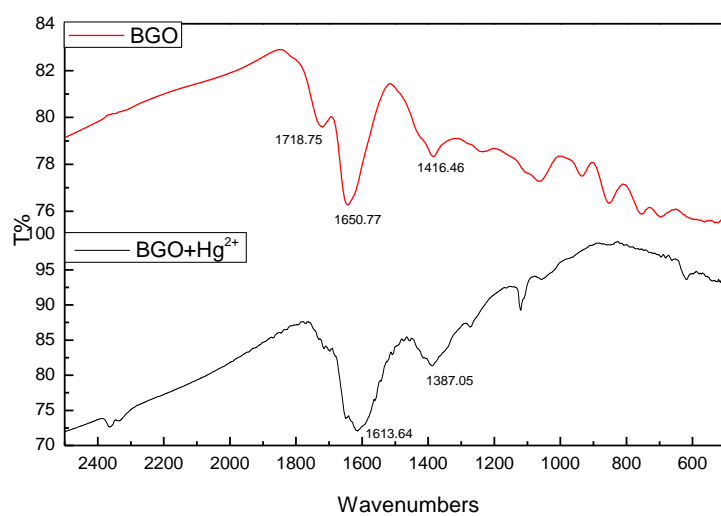

**Figure S2.** FT-IR spectra of BGO and BGO in presence of  $\text{Hg}^{2+}$

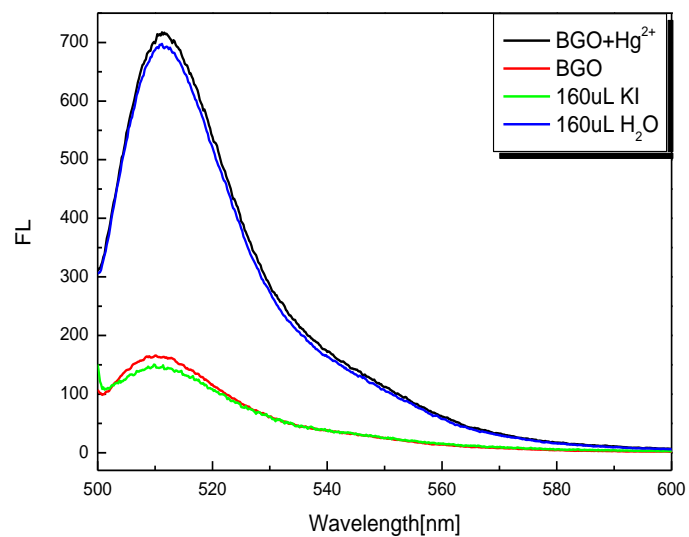

**Figure S3.** The PL can be reversed by KI

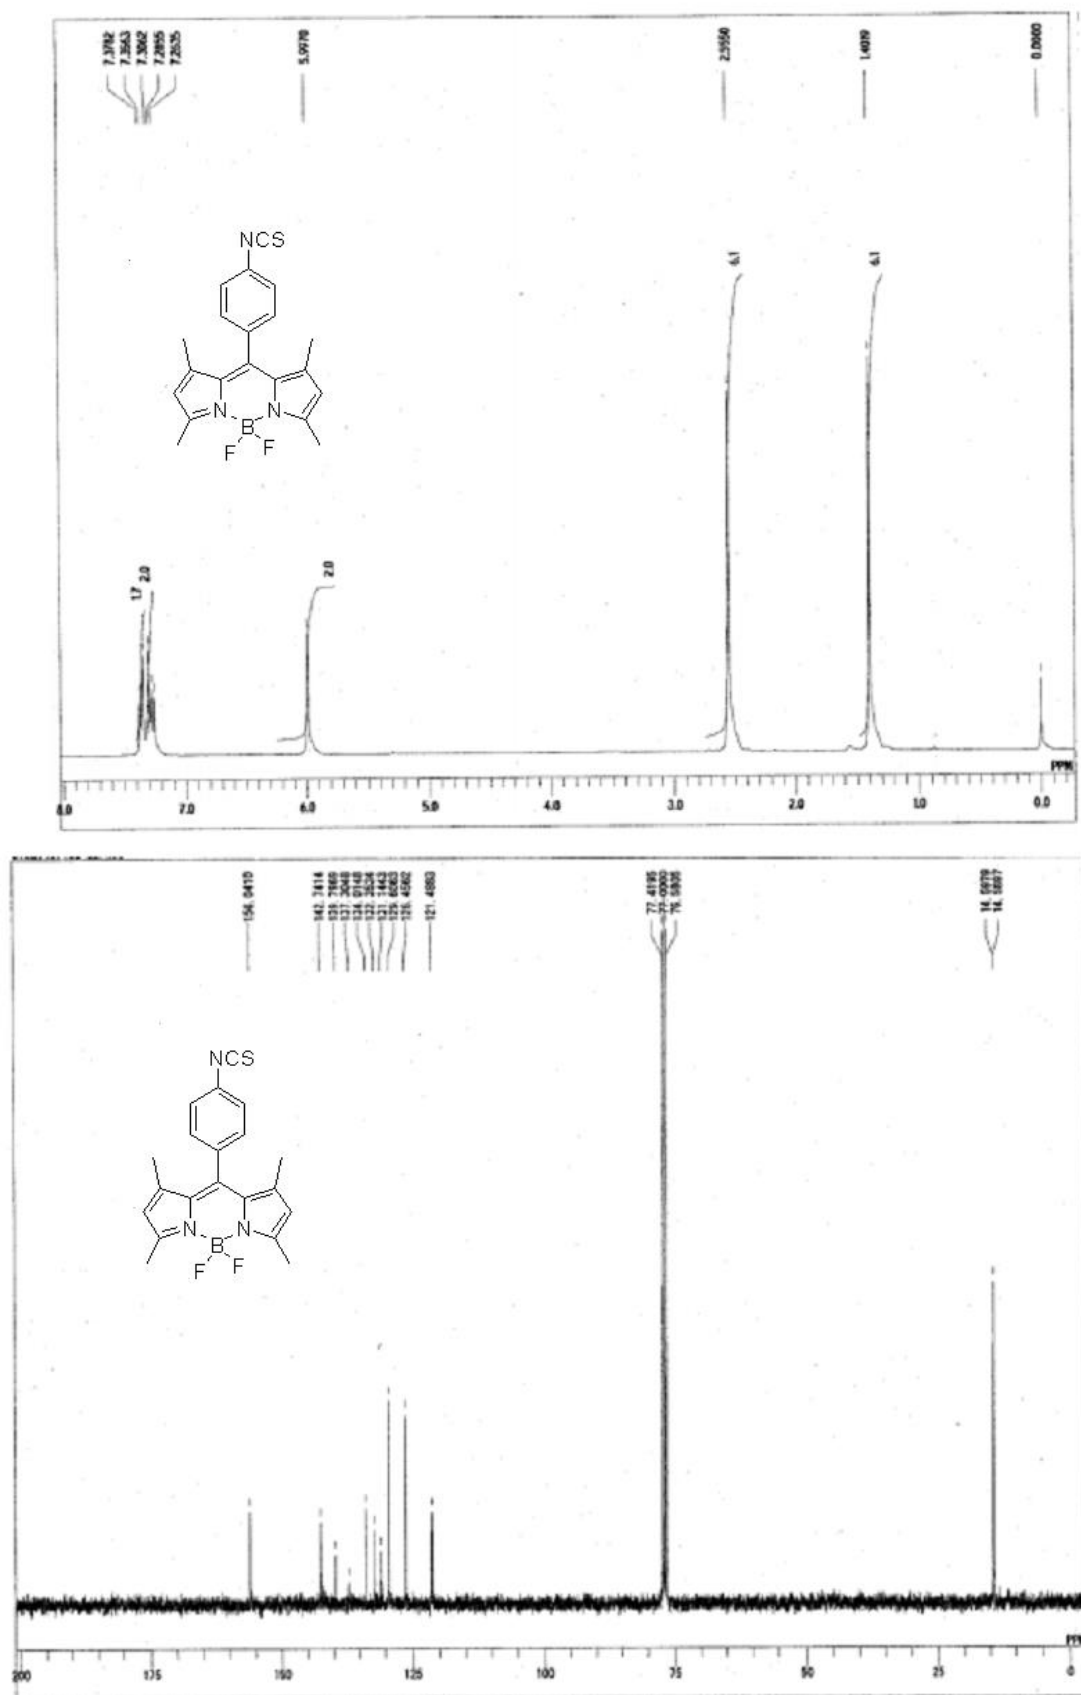

**Figure S4.** The NMR spectra of BODIPY 1
